# Supplementary material
Source: PubMed Central journal article supplement (PMC2873099)

Figure S1. Reciprocal guanidination

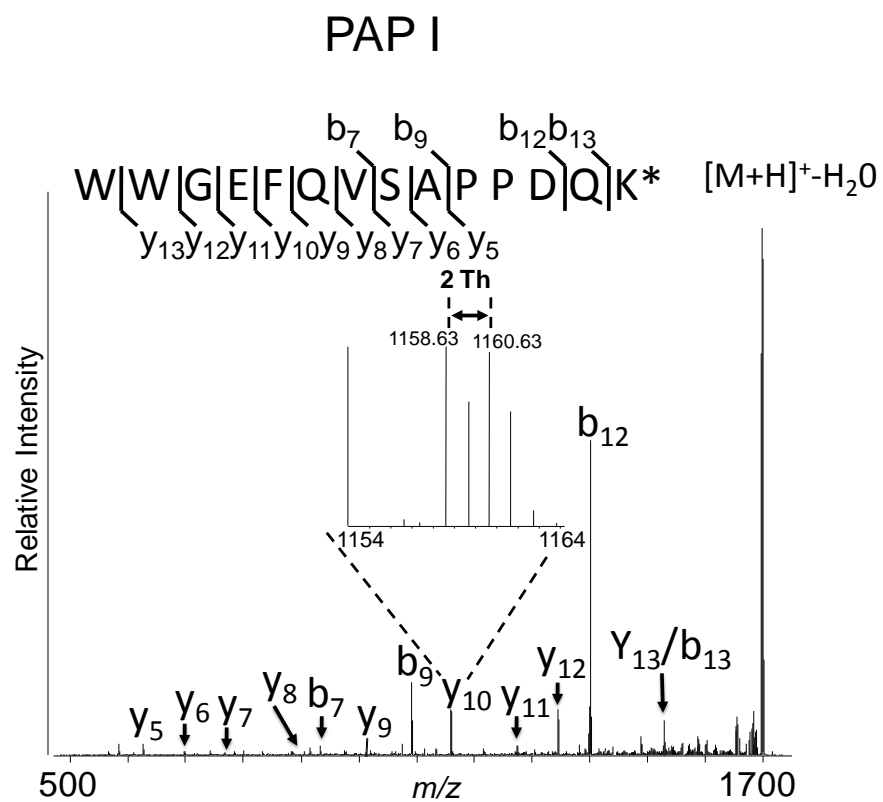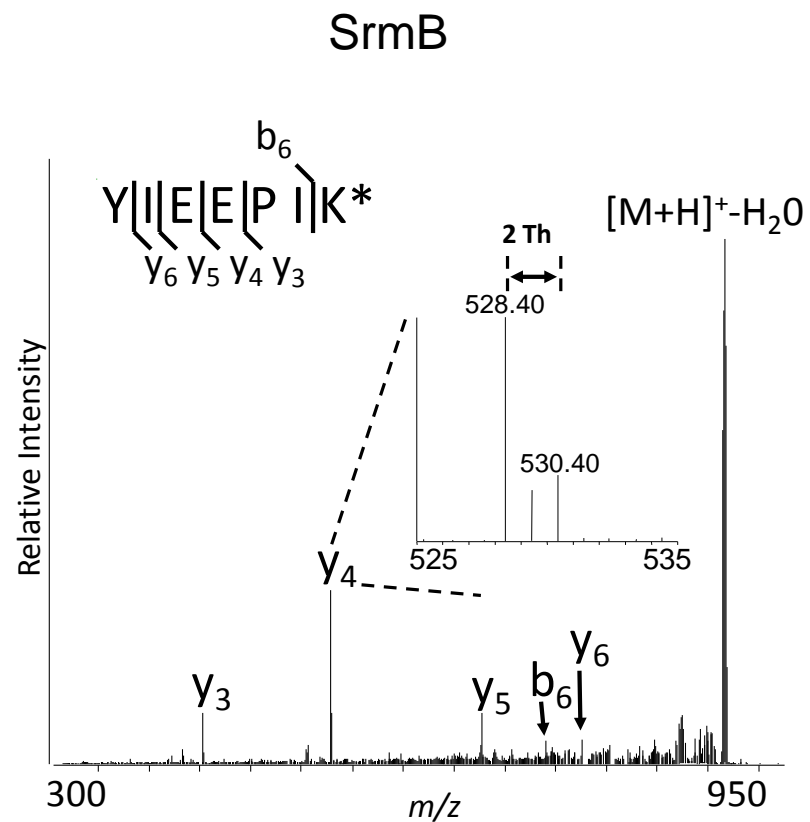

Supplement: NIHMS185950-supplement-01.pdf [file NIHMS185950-supplement-01.pdf]
